# Supplementary material for: Niobium and Tantalum complexes derived from the acids Ph2C(X)CO2H (X = OH, NH2): synthesis, structure and ROP capability
Source: Royal Society of Chemistry journal article supplement (doi:10.1039/d2nj02527b), 2022-01-01
Supplement: d2nj02527b1.pdf [file d2nj02527b1.pdf]

## Electronic Supplementary Information

### Niobium and tantalum complexes derived from the acids $\text{Ph}_2\text{C}(\text{X})\text{CO}_2\text{H}$ ( $\text{X} = \text{OH}, \text{NH}_2$ ): Synthesis, structure and ROP capability

Xin Zhang, Timothy J. Prior and Carl Redshaw\*

*Plastics Collaboratory, Department of Chemistry, The University of Hull, Cottingham Rd, Hull HU6 7RX, United Kingdom.*

#### Contents

**Figure S1.** Alternative view of four niobium cluster present in **1**.

**Figure S2.** Alternative view of the four-tantalum cluster present in **2**·0.5MeCN.

**Figure S3.** IR spectrum of  $\text{L}^1\text{H}_2$ , **1** and **2**·0.5MeCN in nujol.

**Figure S4.** ESI-MS spectrum of **1**.

**Figure S5.** ESI-MS spectrum of **2**·0.5MeCN.

**Figure S6.** Alternative view of the asymmetric unit of **3**·2MeCN.

**Figure S7.** Alternative view of asymmetric unit of **4**·2.25MeCN.

**Figure S8.** IR spectrum of  $\text{L}^2\text{H}_3$ , **3**·2MeCN and **4**·2.25MeCN in nujol.

**Figure S9.** ESI-MS spectrum of **3**·2MeCN.

**Figure S10.** ESI-MS spectrum of **4**·2.25MeCN.

**Figure S11.** Plot of relationship between conversion and time (min) for the polymerization of  $\epsilon$ -CL (Table 1, entry 1-2).

**Figure S12.**  $^1\text{H}$  NMR spectrum of PCL using **1**.

**Figure S13.** MALDI-TOF spectrum of the PCL using **1** in the absence of BnOH.

**Figure S14.** Plot of relationship between conversion and time (min) for the polymerization of *r*-LA (Table 2, entry 5-8).

**Figure S15.** 2D homo *J*-resolved NMR (CDCl<sub>3</sub>, 400 MHz) of PLA (Table 2, entry 5).

**Figure S16.** 2D homo *J*-resolved NMR (CDCl<sub>3</sub>, 400 MHz) of PLA (Table 2, entry 6).

**Figure S17.** 2D homo *J*-resolved NMR (CDCl<sub>3</sub>, 400 MHz) of PLA (Table 2, entry 7).

**Figure S18.** 2D homo *J*-resolved NMR (CDCl<sub>3</sub>, 400 MHz) of PLA (Table 2, entry 8).

**Figure S19.** 2D homo *J*-resolved NMR (CDCl<sub>3</sub>, 400 MHz) of PLA (Table 2, entry 9).

**Figure S20.** 2D homo *J*-resolved NMR (CDCl<sub>3</sub>, 400 MHz) of PLA (Table 2, entry 10).

**Figure S21.** 2D homo *J*-resolved NMR (CDCl<sub>3</sub>, 400 MHz) of PLA (Table 2, entry 11).

**Figure S22.** 2D homo *J*-resolved NMR (CDCl<sub>3</sub>, 400 MHz) of PLA (Table 2, entry 12).

**Figure S23.** <sup>1</sup>H NMR (CDCl<sub>3</sub>, 400 MHz) of PDLLA-*b*-CL (Table 3, entry 3).

**Figure S24.** <sup>1</sup>H NMR (CDCl<sub>3</sub>, 400 MHz) of the intensity of methylene protons for CL-LA and CL-CL (Table 3, entry 6).

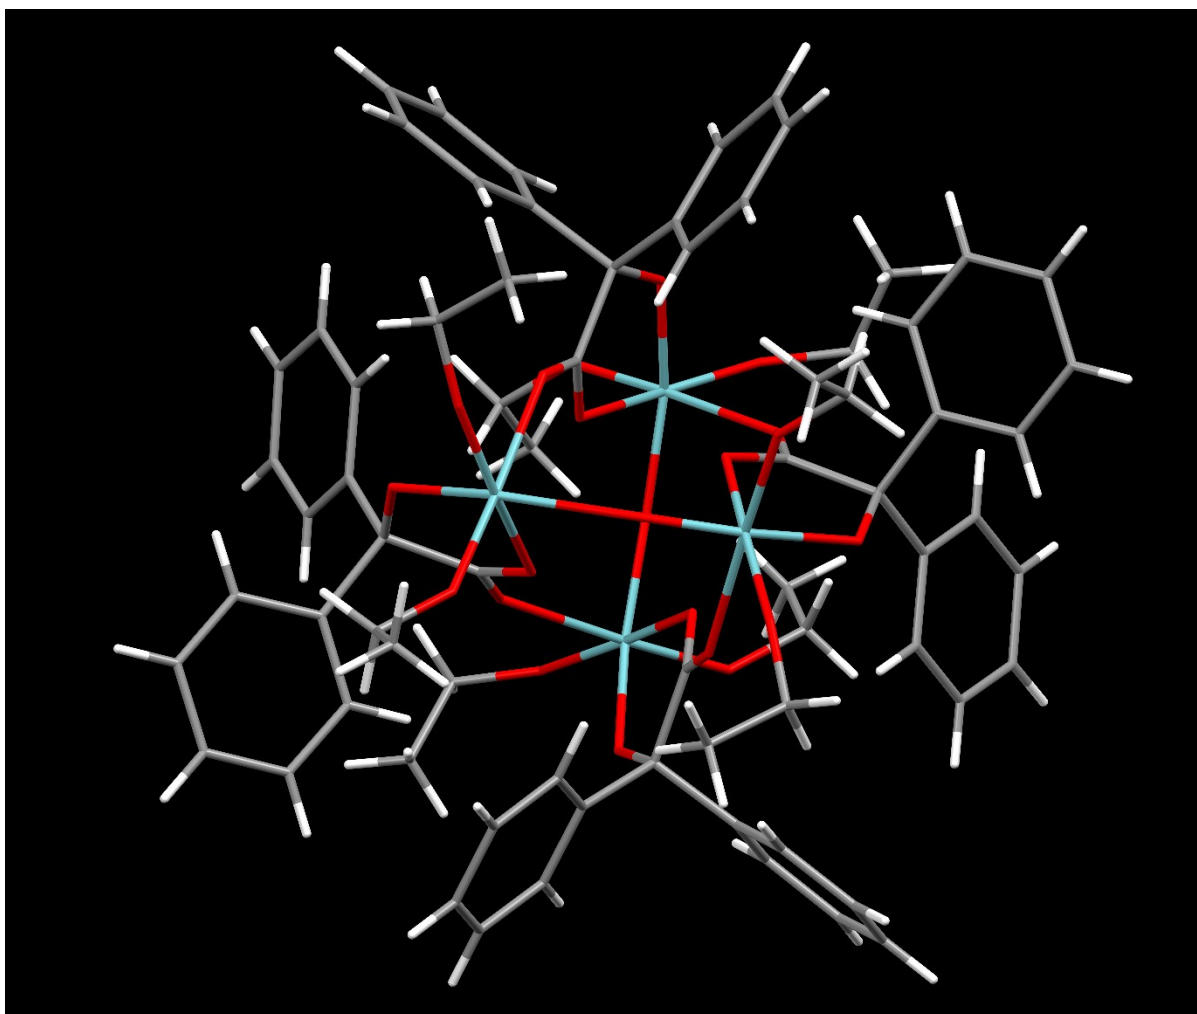

**Figure S1.** Alternative view of four niobium cluster present in **1**.

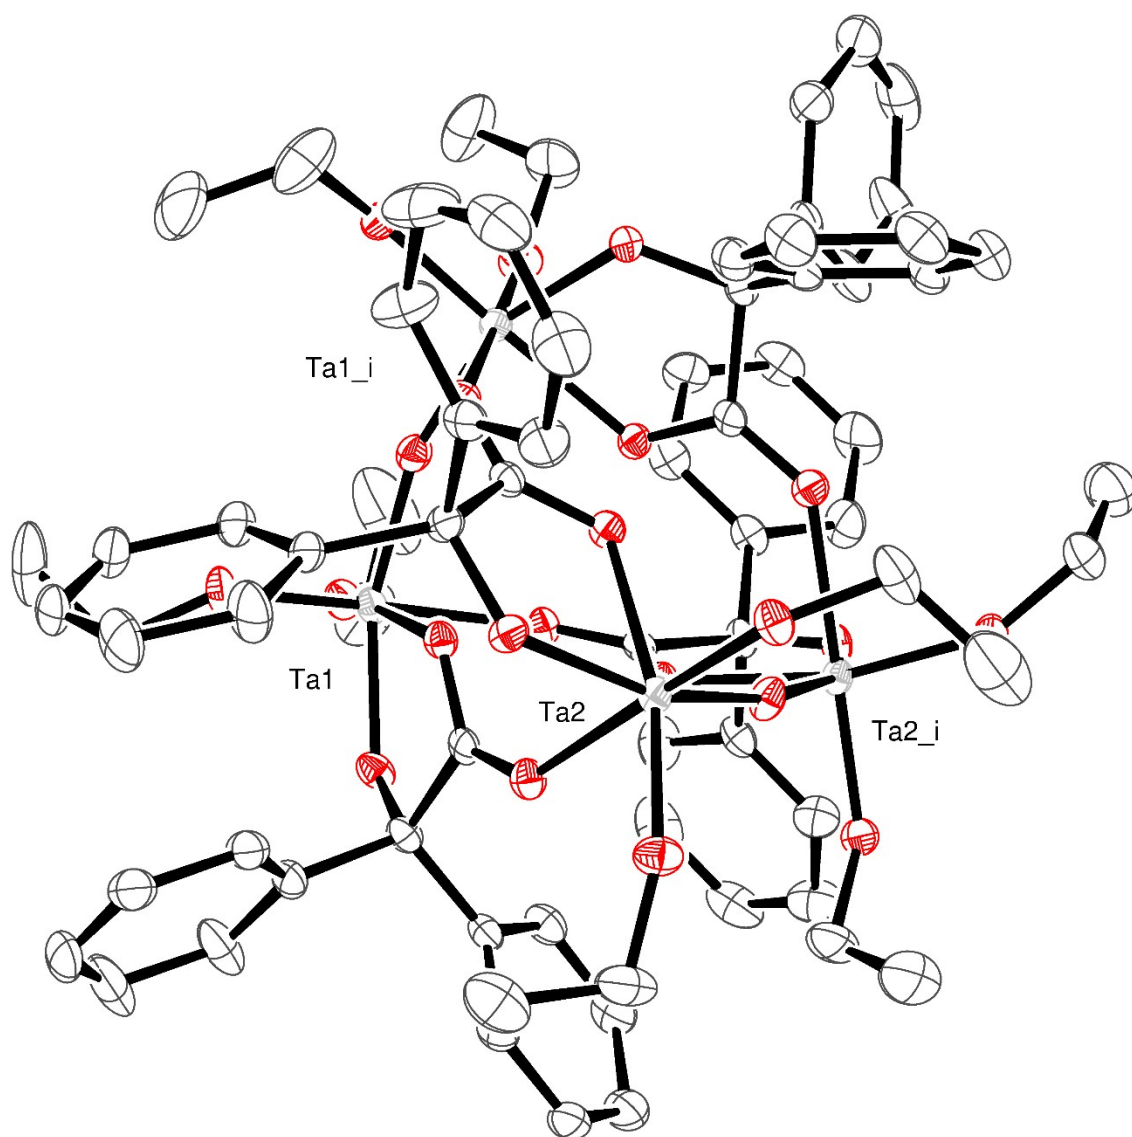

**Figure S2.** Alternative view of the four-tantalum cluster present in **2·0.5MeCN**. Atoms are drawn as 50% probability ellipsoids. Symmetry operation:  $i = 1-x, y, \frac{1}{2} -z$ .

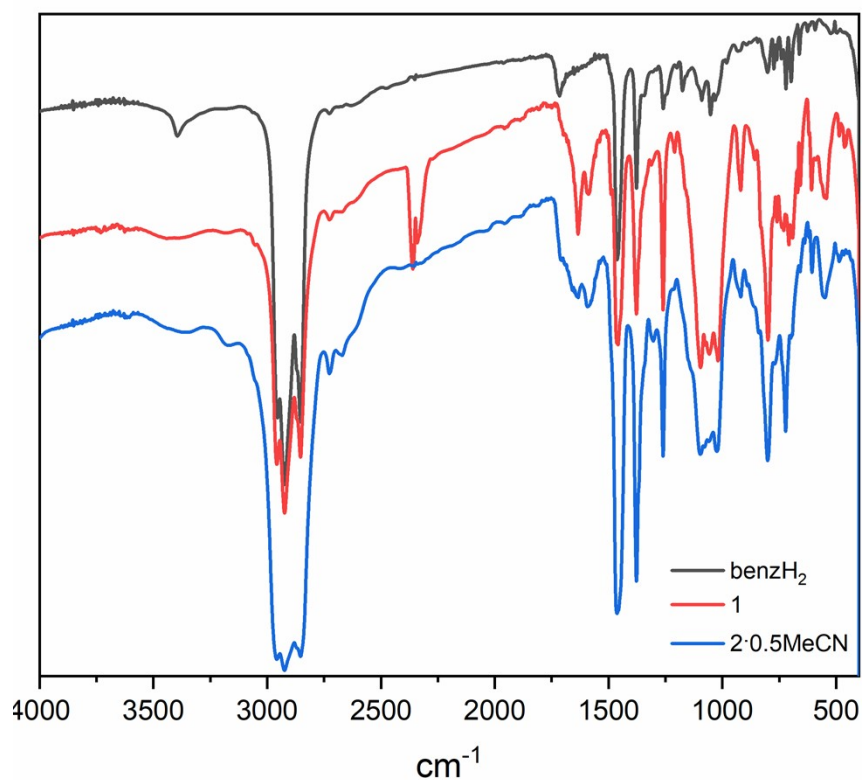

**Figure S3.** IR spectrum of L<sup>1</sup>H<sub>2</sub>, 1 and 2·0.5MeCN in nujol.

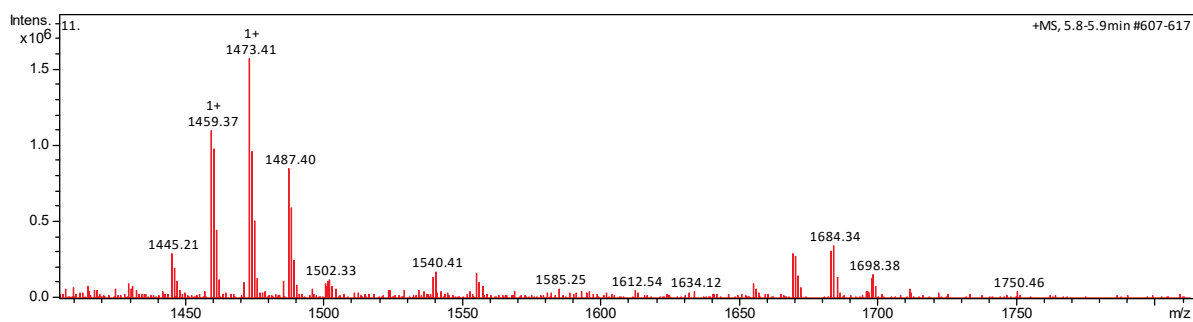

**Figure S4.** ESI-MS spectrum of 1.

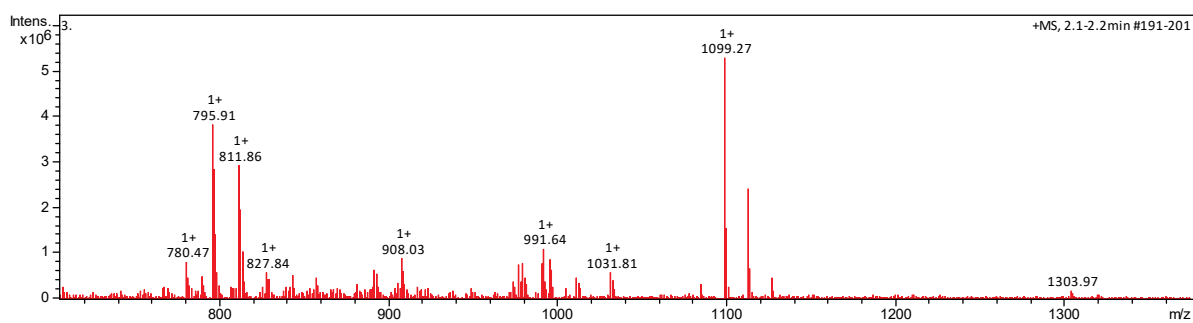

**Figure S5.** ESI-MS spectrum of 2·0.5MeCN.

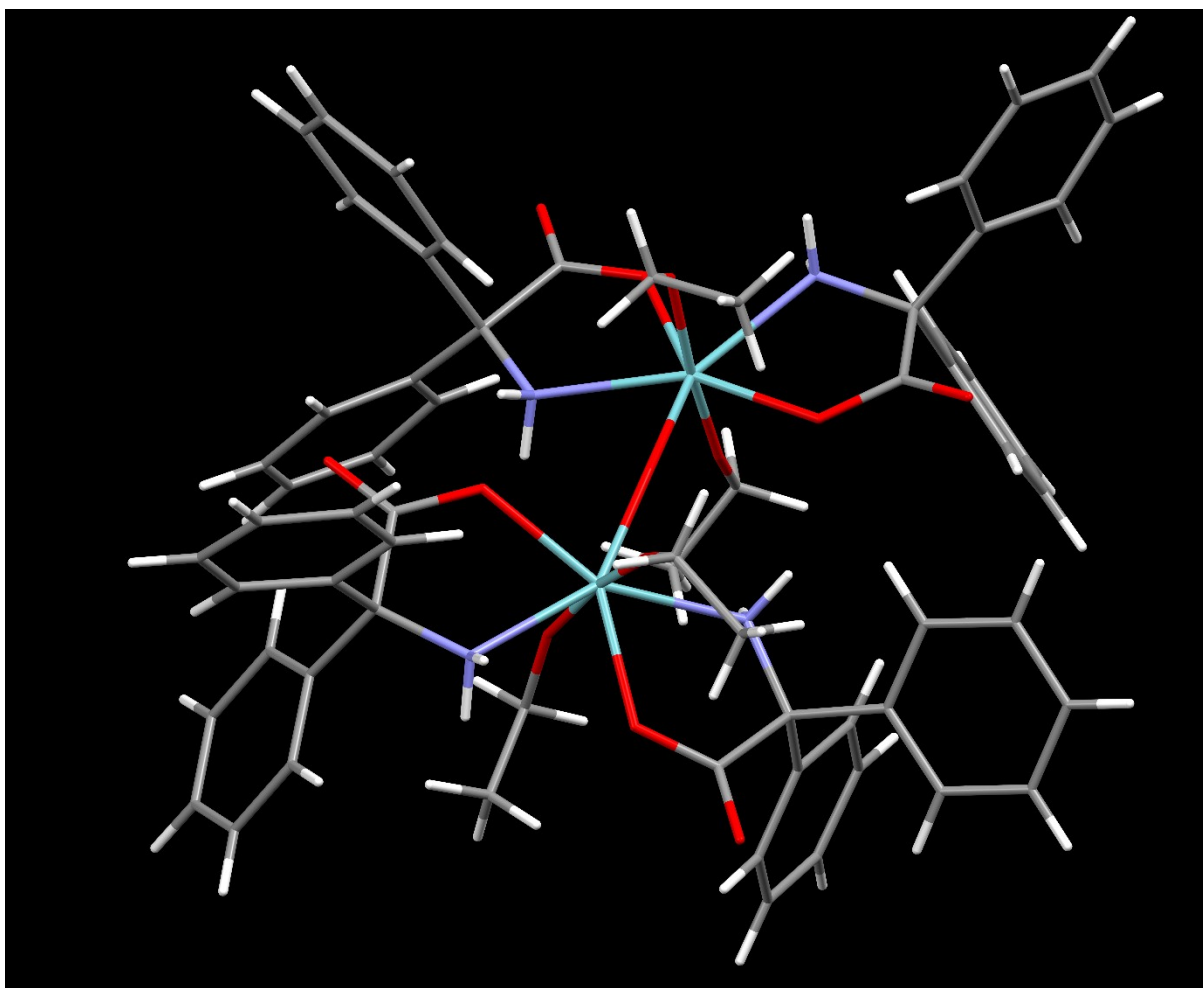

**Figure S6.** Alternative view of the asymmetric unit of **3·2MeCN**

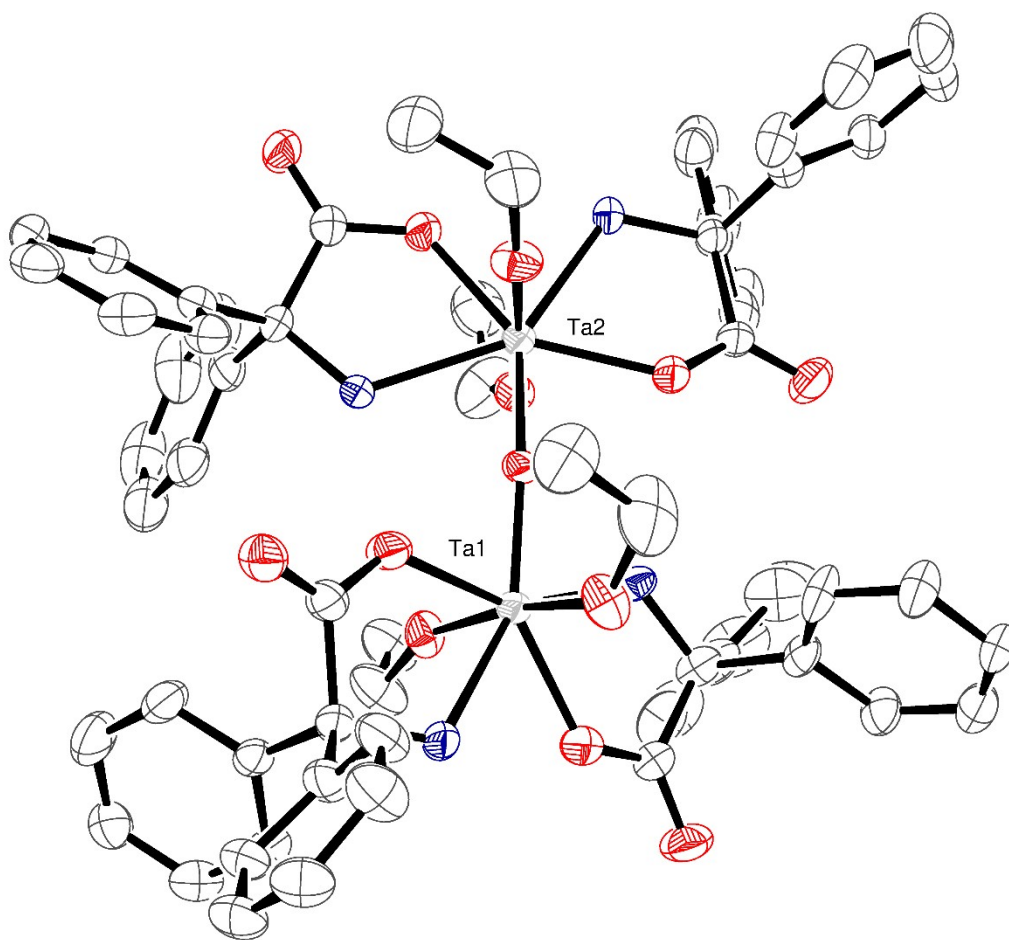

**Figure S7.** Asymmetric unit of 4·2.25MeCN with atoms drawn as 50% probability ellipsoids.

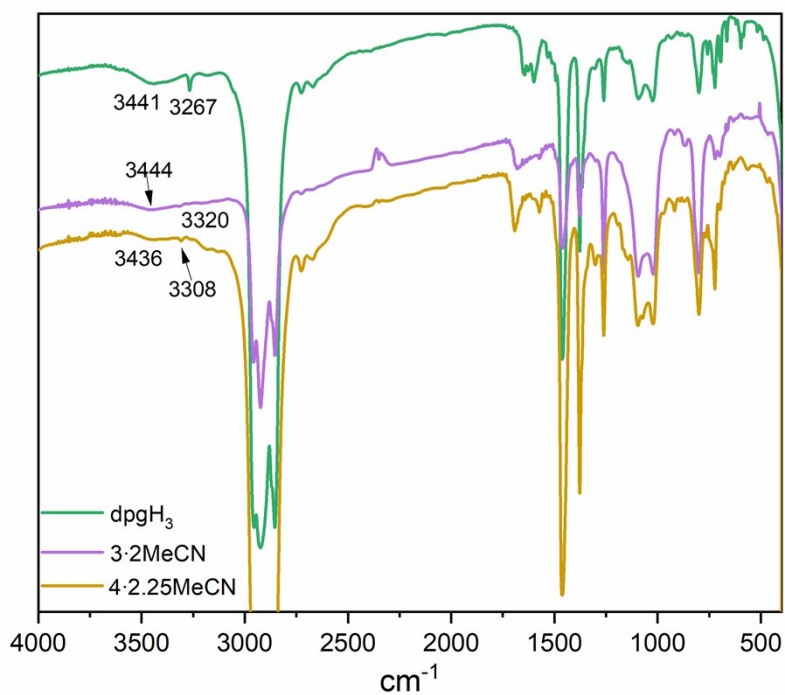

**Figure S8.** IR spectrum of L<sup>2</sup>H<sub>3</sub>, 3·2MeCN and 4·2.25MeCN in nujol.

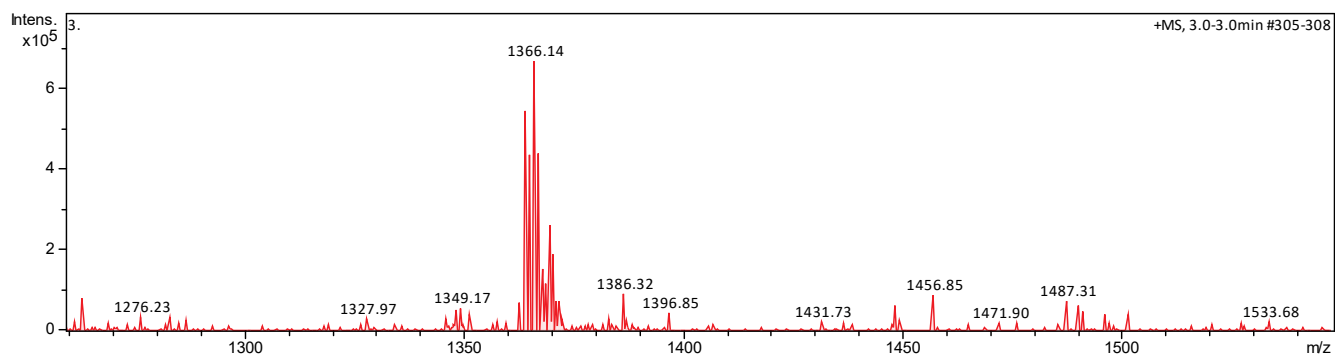

**Figure S9.** ESI-MS spectrum of 3·2MeCN.



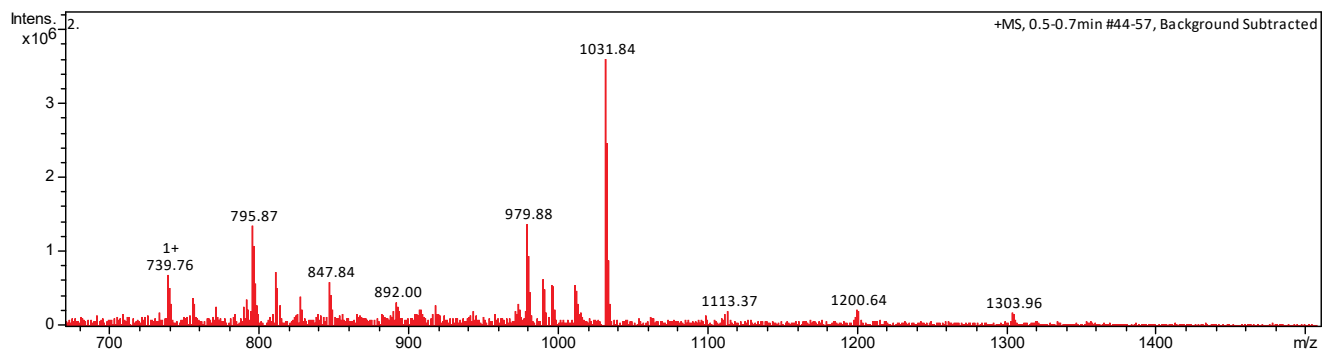

**Figure S10.** ESI-MS spectrum of 4·2.25MeCN.

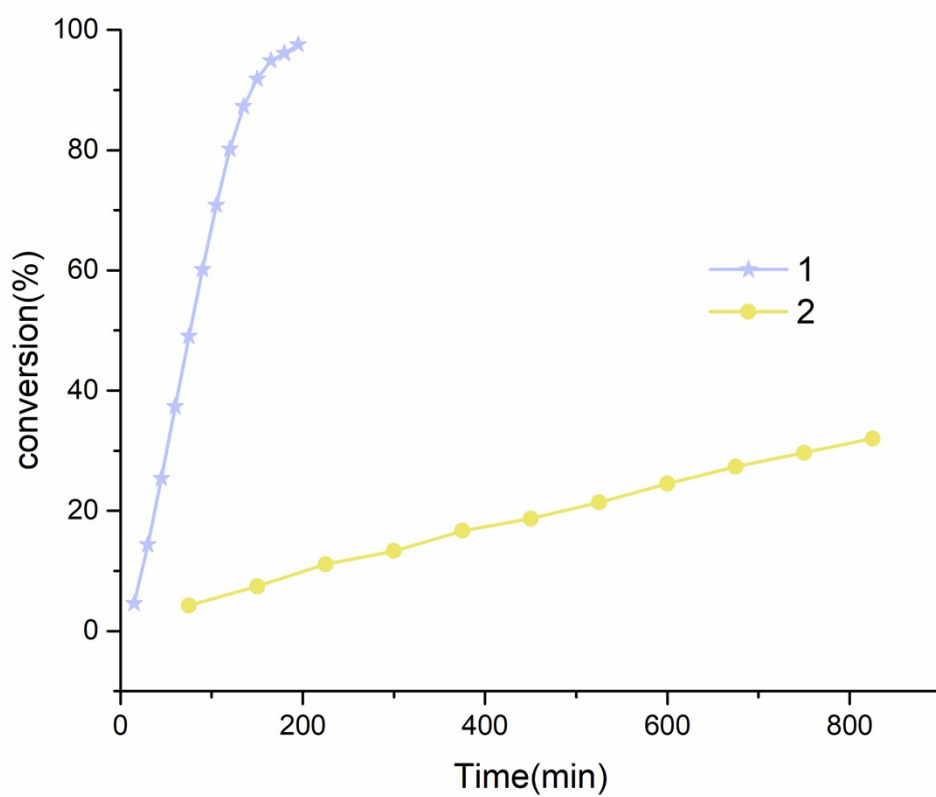

**Figure S11.** Plot of relationship between conversion and time (min) for the polymerization of  $\epsilon$ -CL (Table 1, entry 1-2).

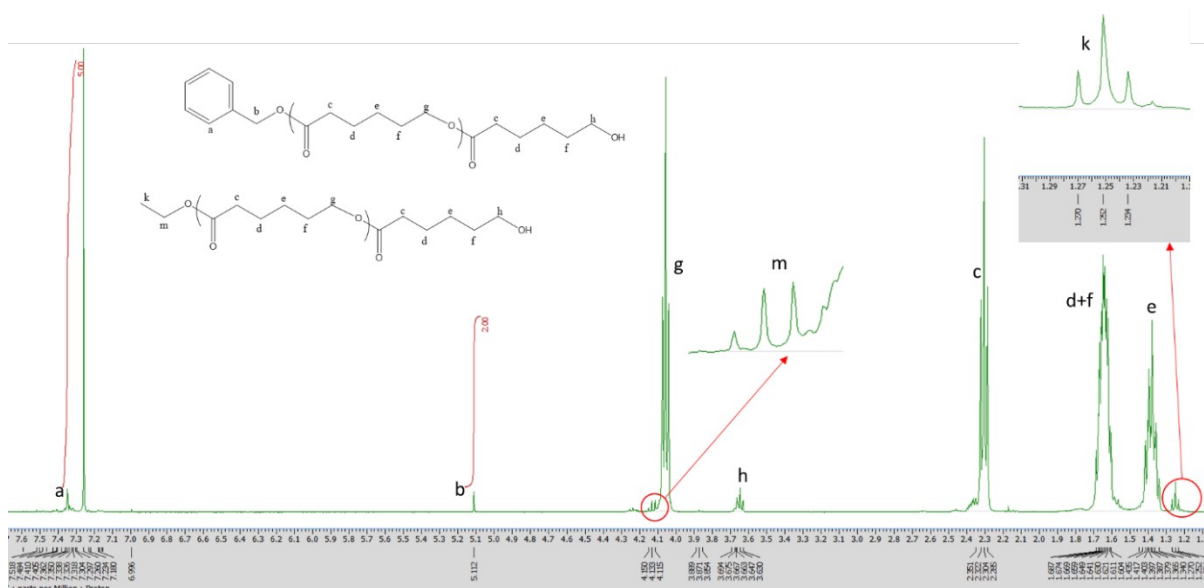

**Figure S12.**  $^1\text{H}$  NMR spectrum ( $\text{CDCl}_3$ ) of PCL catalyzed by **1** (Table 1, entry 1).

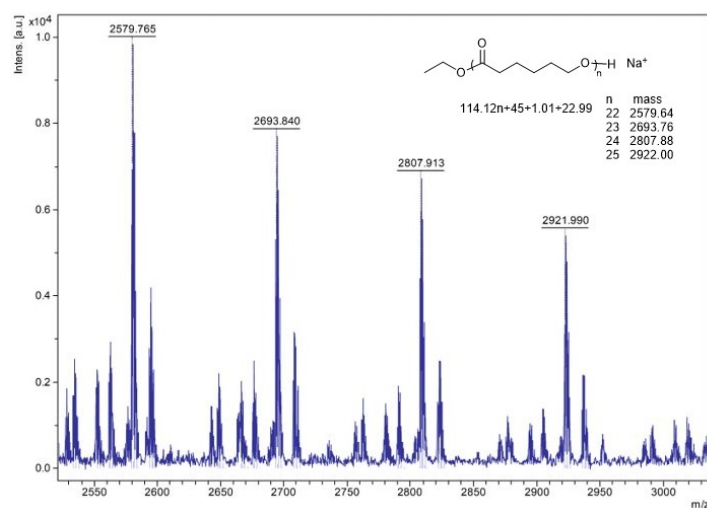

**Figure S13.** MALDI-TOF spectrum of the PCL catalysed by **1** in the absence of BnOH (Table 1, entry 5);  $n$  is the degree of polymerization.

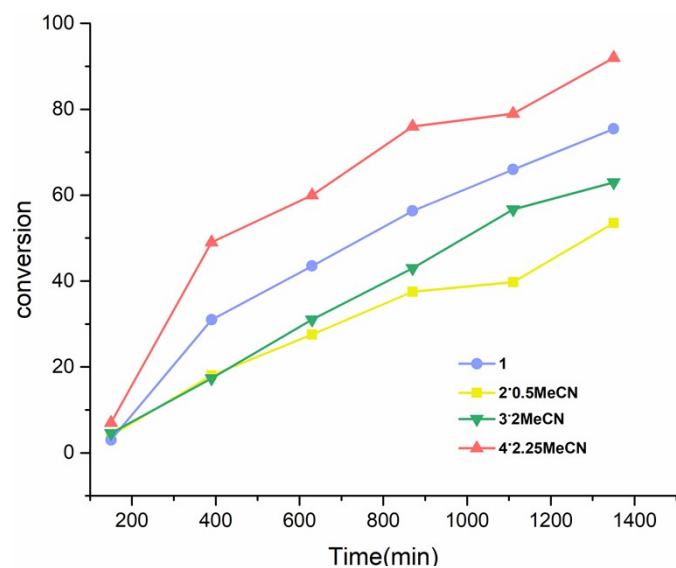

**Figure S14.** Plot of relationship between conversion and time (min) for the polymerization of *r*-LA (Table 2, entry 5-8).

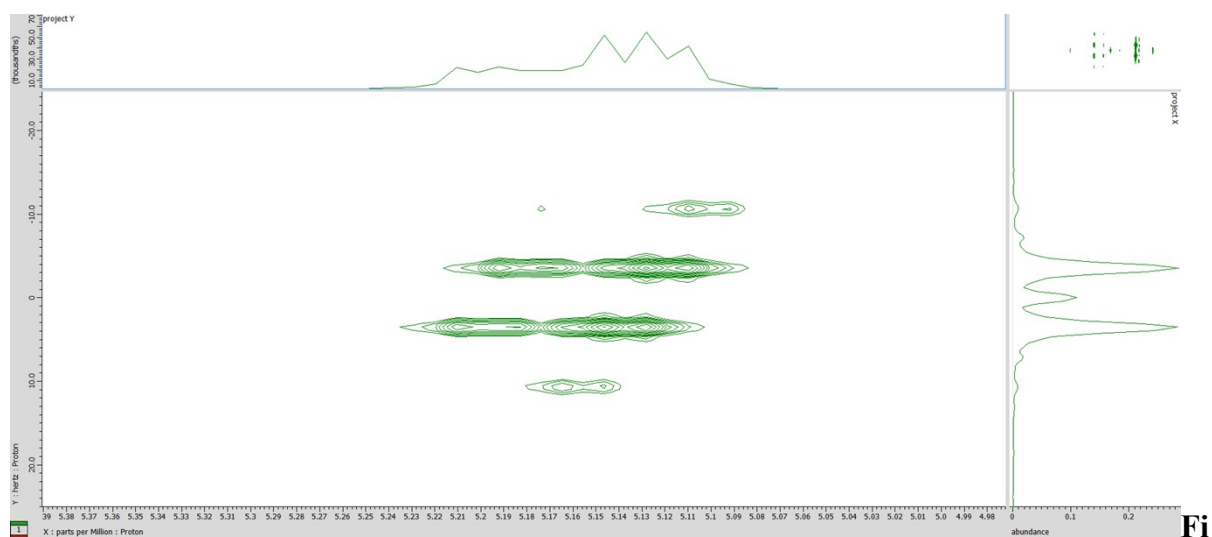

**Figure S15.** 2D homo *J*-resolved NMR (CDCl<sub>3</sub>, 400 MHz) of PLA (Table 2, entry 5).

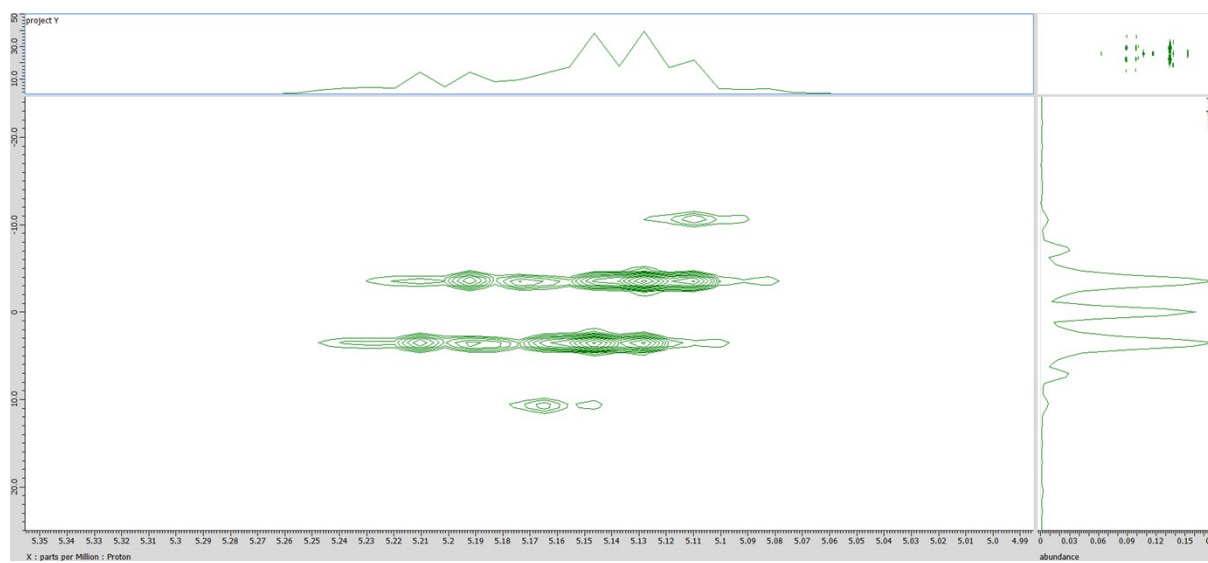

**Figure S16.** 2D homo *J*-resolved NMR (CDCl<sub>3</sub>, 400 MHz) of PLA (Table 2, entry 6).

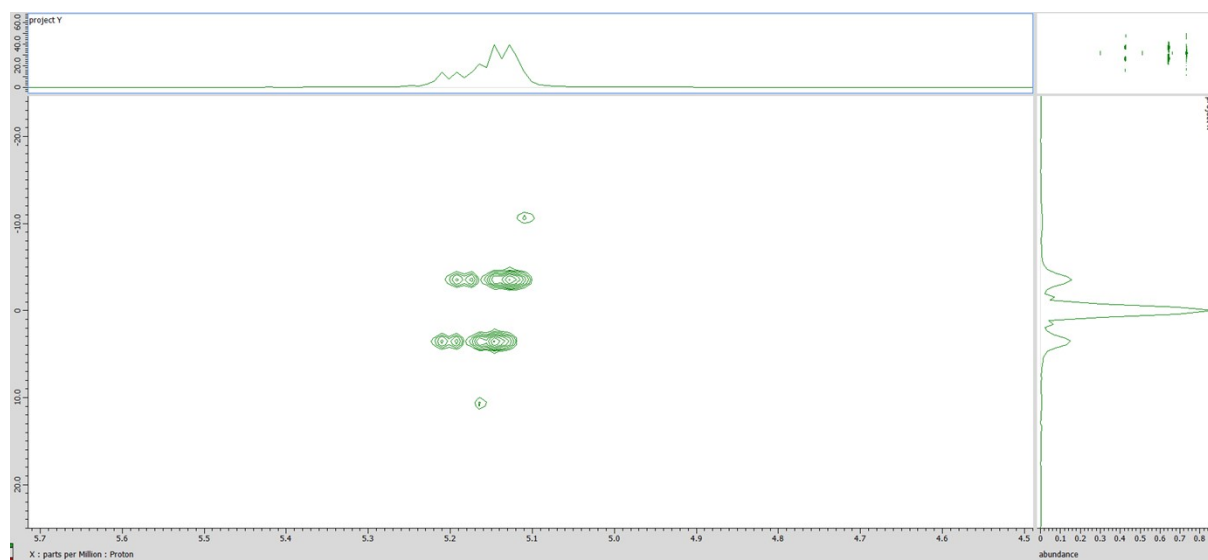

**Figure S17.** 2D homo *J*-resolved NMR (CDCl<sub>3</sub>, 400 MHz) of PLA (Table 2, entry 7).

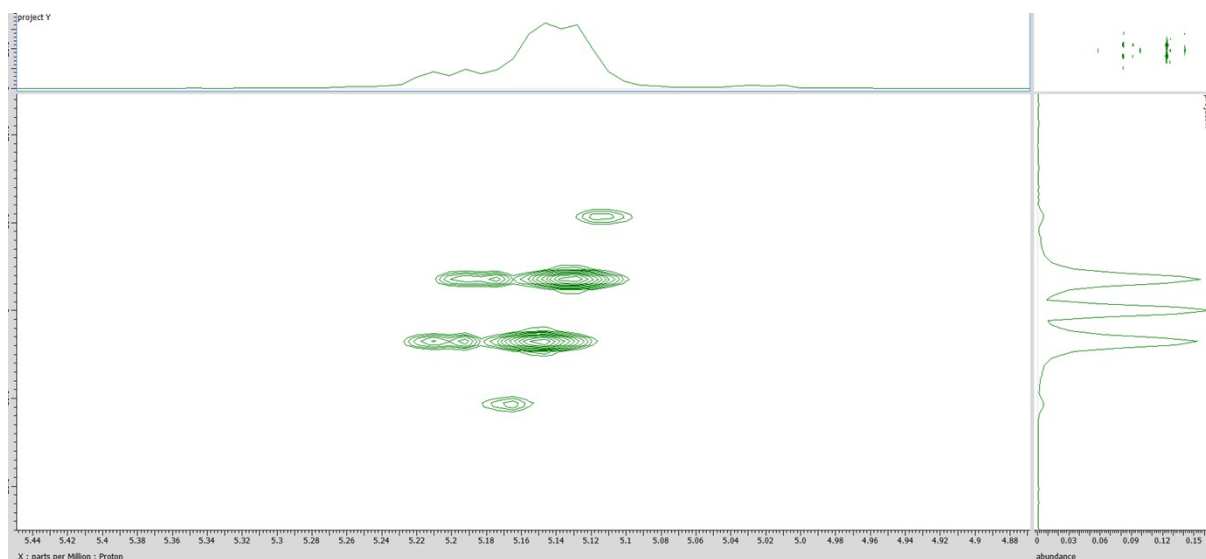

**Figure S18.** 2D homo *J*-resolved NMR ( $\text{CDCl}_3$ , 400 MHz) of PLA (Table 2, entry 8).

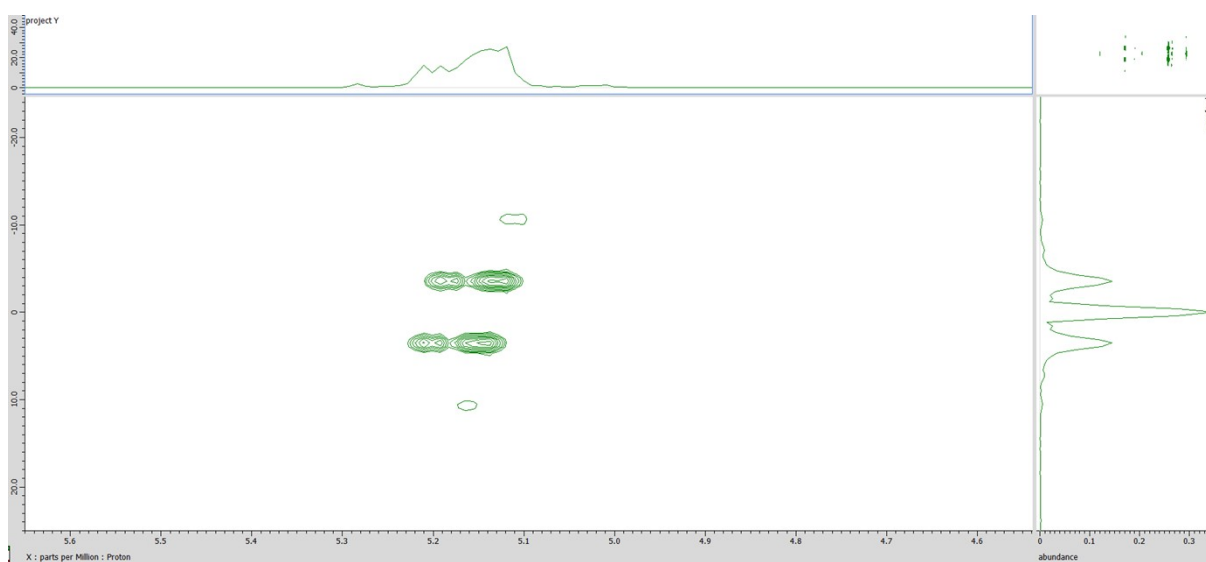

**Figure S19.** 2D homo *J*-resolved NMR ( $\text{CDCl}_3$ , 400 MHz) of PLA (Table 2, entry 9).

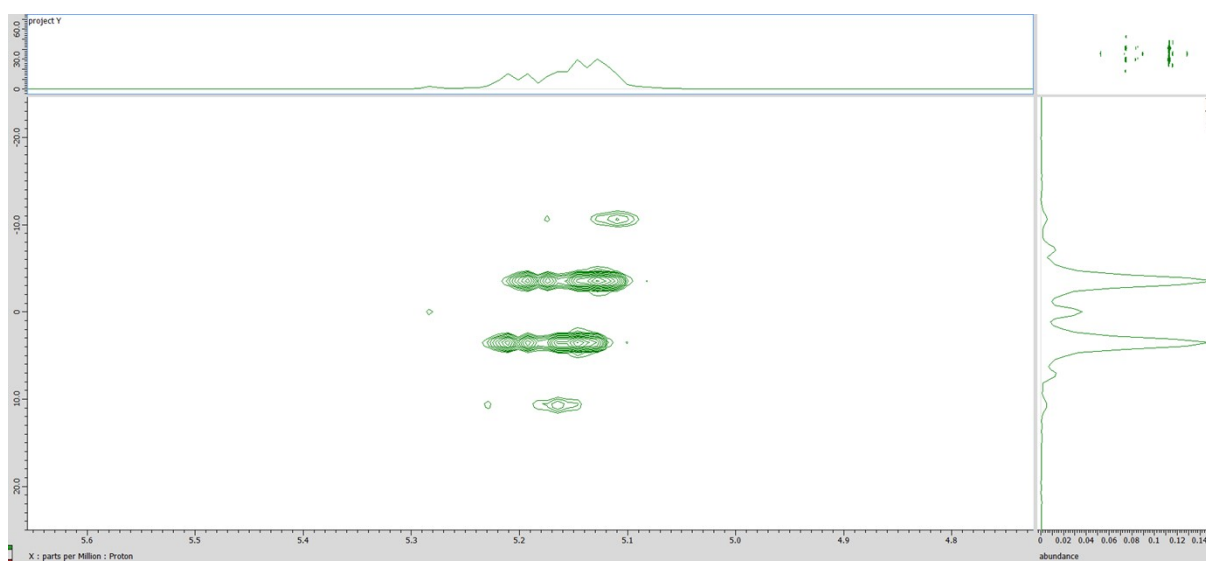

**Figure S20.** 2D homo *J*-resolved NMR (CDCl<sub>3</sub>, 400 MHz) of PLA (Table 2, entry 10).

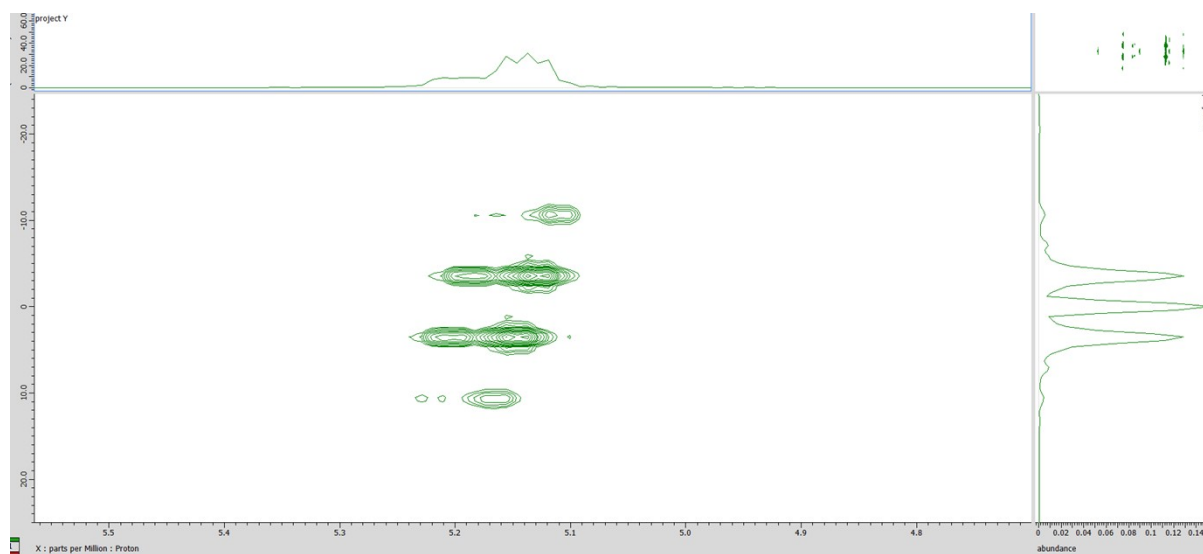

**Figure S21.** 2D homo *J*-resolved NMR (CDCl<sub>3</sub>, 400 MHz) of PLA (Table 2, entry 11).

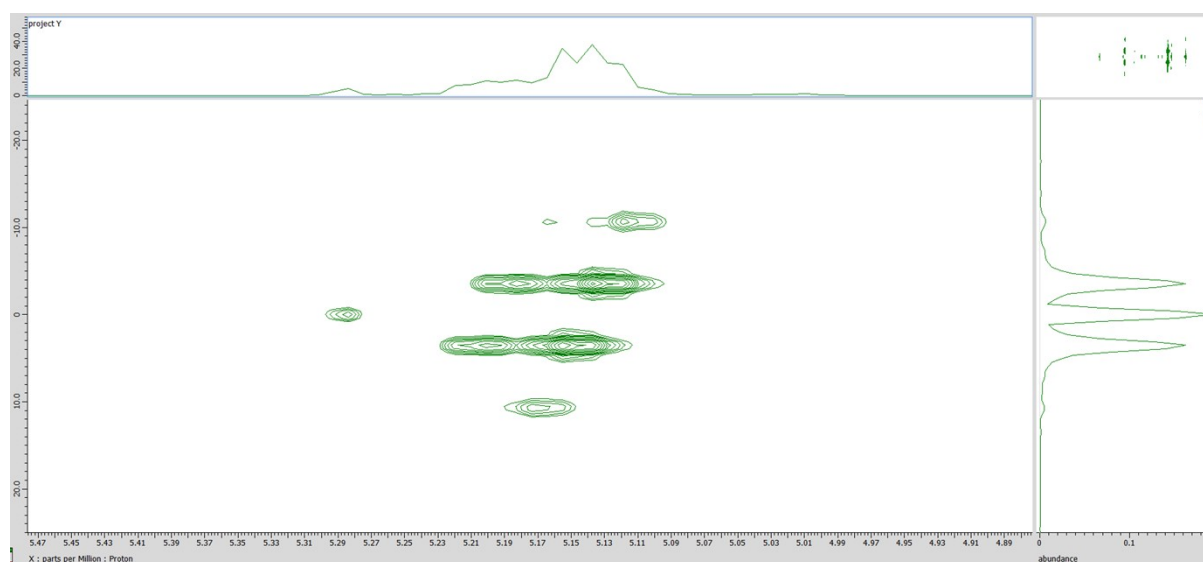

**Figure S22.** 2D homo *J*-resolved NMR (CDCl<sub>3</sub>, 400 MHz) of PLA (Table 2, entry 12).

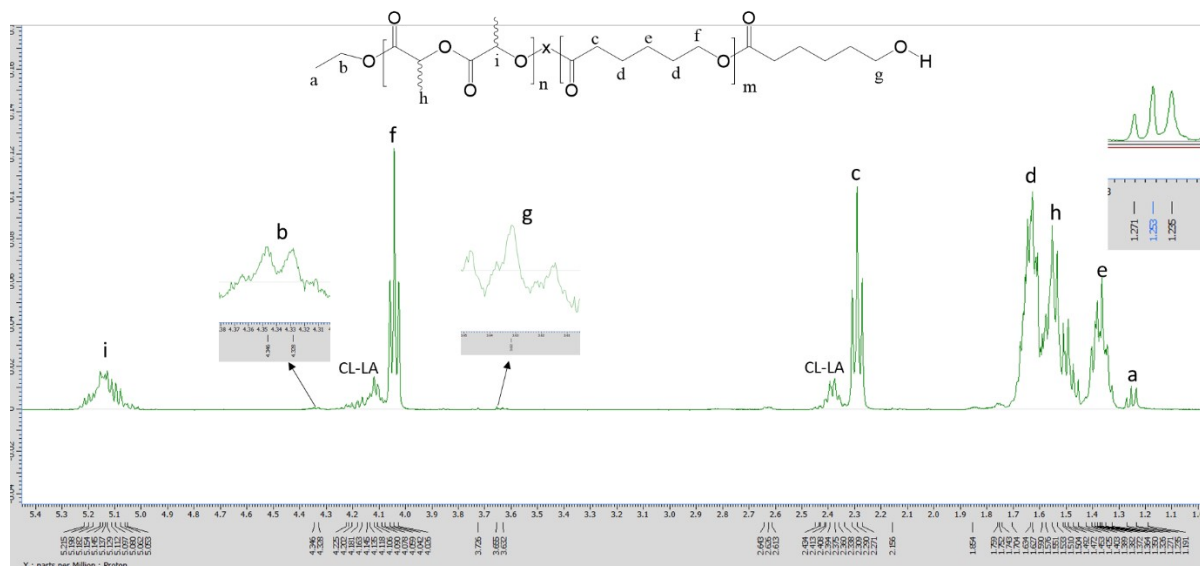

**Figure S23.**  $^1\text{H}$  NMR ( $\text{CDCl}_3$ , 400 MHz) of PDLLA-*b*-CL (Table 3, entry 3).

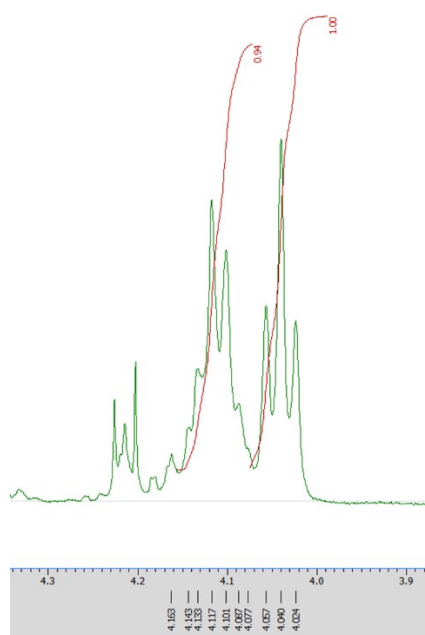

**Figure S24.**  $^1\text{H}$  NMR ( $\text{CDCl}_3$ , 400 MHz) of the intensity of methylene protons for CL-LA and CL-CL (Table 3, entry 6).
